# Supplementary material
Source: PubMed Central journal article supplement (PMC6386543)
Supplement: IAI.00788-18-s0001.pdf [file IAI.00788-18-s0001.pdf]

## Supplemental Materials

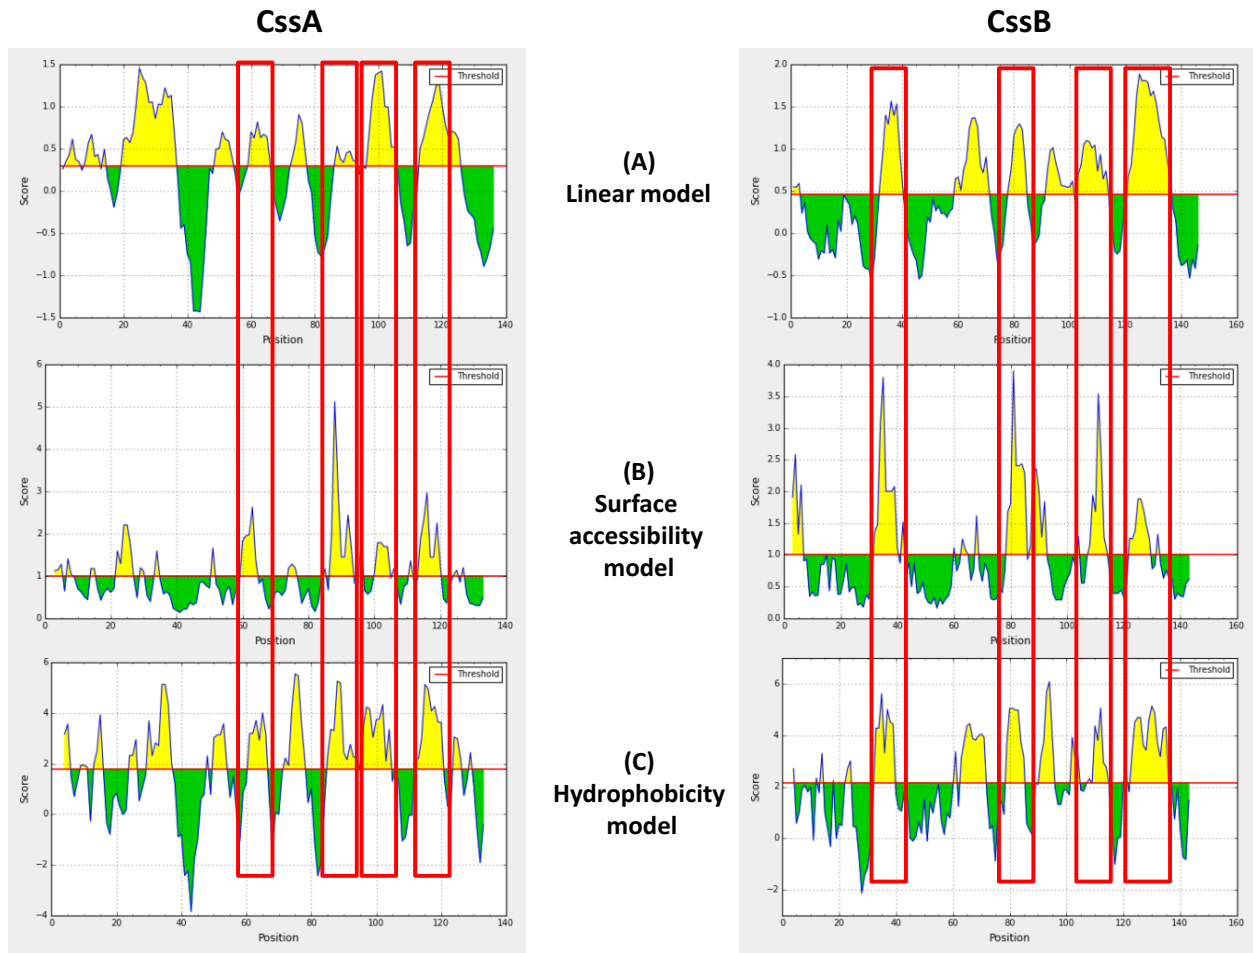

**Figure S1. *In silico* evaluation of Cssa and Cspb B cell epitopes.** The mature amino acid sequence of Cssa and Cspb subunits (GenBank Accession Numbers AAB51361 and AAB51362, respectively) from the ETEC E8775 CS6 colonization factor were analyzed by three open access B cell epitope prediction software (<http://tools.iedb.org/bcell/>). (A) Linear Model; (B) Surface Accessibility Model; (C) Hydrophobicity Model. For all models, default threshold was used. Red boxes indicate areas of the proteins that were identified as possible B cell epitopes by all approaches.

**Table S1.** Construction of expression clones for CS6 dimeric and trimeric fusions originating from *CssA*.

| Clone                                    | Primer Set Description                                                                                                                                                                              | Primer - Sequence                                                                                                |
|------------------------------------------|-----------------------------------------------------------------------------------------------------------------------------------------------------------------------------------------------------|------------------------------------------------------------------------------------------------------------------|
| <i>pET24 - cssA</i>                      | PCR of <i>cssA</i> from ETEC E8775 with internal <u>SnaBI</u> – digested with <u>NdeI</u> and <u>XhoI</u> and cloned into <i>pET-24a(+)</i>                                                         | AF -<br>GCGGCGGCGCATATGAGAACAGAAATAGCGACTAAAAA<br>C                                                              |
|                                          |                                                                                                                                                                                                     | AR -<br>GCGGCGCTCGAGTTGTTTATTGTCGTTTACGTAGTAACC<br>AACCATAACC                                                    |
| <i>pET24 - dsc<sub>A</sub>cssA 6xhis</i> | Oligos containing DNKQ linker and <i>dsc16</i> from <i>cssA</i> – annealed and digested with <u>SnaBI</u> and <u>XhoI</u> , then ligated to <i>pET24 - cssA</i> at <u>SnaBI</u> and <u>XhoI</u>     | dsc16AF -<br>GCGGCGGCGTACGTAAACGACAATAAACAAACGTACCGA<br>GATTGCCACCAAGAATTTCCGGTGAGCACCACCATCAG<br>CCTCGAGGCGGCG  |
|                                          |                                                                                                                                                                                                     | dsc16AR -<br>CGCCGCCTCGAGGCTGATGGTGGTGCTCACCGGAAAATT<br>CTTGGTGGCAATCTCGGTACGTGTGTTTATTGTCGTTTACG<br>TACGCCCGCGC |
| <i>pET24-dsc<sub>A</sub>cssAA 6xhis</i>  | PCR of <i>cssA</i> from <i>pET24 - dsc<sub>A</sub>cssA 6xhis</i> – digested with <u>ZraI</u> and <u>XhoI</u> then ligated to <i>pET24-dsc<sub>A</sub>cssA 6xhis</i> at <u>SnaBI</u> and <u>XhoI</u> | A1F -<br>GGCGGCGGCGACGTCAACGACAATAAACAAAGAACAG<br>AAATAGCGACTAAAACTTCCC                                          |
|                                          |                                                                                                                                                                                                     | dscAR - GCGGCGCTCGAGGCTGATGGTGGTGC                                                                               |
| <i>pET24-dsc<sub>B</sub>cssAB 6xhis</i>  | PCR of <i>cssB</i> from <i>pET24 - dsc<sub>B</sub>cssB 6xhis</i> – digested with <u>ZraI</u> and <u>XhoI</u> then ligated to <i>pET24-dsc<sub>A</sub>cssA 6xhis</i> at <u>SnaBI</u> and <u>XhoI</u> | B1F-<br>GGCGGCGGCGACGTCAACGACAATAAACAAAGGAACTG<br>GCAATATAAATCTCTGG                                              |
|                                          |                                                                                                                                                                                                     | dscBR - GCGGCGCTCGAGCTGTTTCGATGTTTCAG                                                                            |
| <i>pET24-dsc<sub>A</sub>cssAB 6xhis</i>  | Oligos containing DNKQ linker and <i>dsc16</i> from <i>cssA</i> – annealed and digested with <u>Cac8I</u> and <u>XhoI</u> then ligated to <i>pET24-cssAB</i> at <u>SnaBI</u> and <u>XhoI</u>        | dsc16A1F -<br>GCGGCGGCGGCTAGCAATGACAATAAACAAAGAACAGA<br>AATAGCGACTAAAACTTCCCAGTATCAACGACTATTTT<br>ACTCGAGGCGGCG  |
|                                          |                                                                                                                                                                                                     | dsc16A1R –                                                                                                       |

|                                             |                                                                                                                                                                                  |                                                                                                                                             |
|---------------------------------------------|----------------------------------------------------------------------------------------------------------------------------------------------------------------------------------|---------------------------------------------------------------------------------------------------------------------------------------------|
|                                             |                                                                                                                                                                                  | CGCCGCTCGAGTGAAATAGTCGTTGATACTGGGAAGTT<br>TTTAGTCGCTATTTCTGTTCTTTGTTTATTGTCATTGCTA<br>GCCGCCGCCGC                                           |
| <i>pET24-ntd_dsc<sub>A</sub>cssAB 6xhis</i> | Site directed mutagenesis performed to delete 15 N-terminal amino acids of <i>cssA</i> in <i>pET24-dsc<sub>A</sub>cssAB 6xhis</i>                                                | ntdABF -<br>GAAGGAGATATACATATGTCAAAAAGTTTTTTTGCACCT<br>G<br>ntdABR -<br>CAGGTGCAAAAAAACTTTTTGACATATGTATATCTCCTT<br>C                        |
| <i>pET24-ntd_dsc<sub>B</sub>cssAB 6xhis</i> | Site directed mutagenesis performed to delete 15 N-terminal amino acids of <i>cssA</i> in <i>pET24-dsc<sub>B</sub>cssAB 6xhis</i>                                                | ntdABF -<br>GAAGGAGATATACATATGTCAAAAAGTTTTTTTGCACCT<br>G<br>ntdABR -<br>CAGGTGCAAAAAAACTTTTTGACATATGTATATCTCCTT<br>C                        |
| <i>pET24-dsc<sub>A</sub>cssABA 6xhis</i>    | PCR of <i>cssBA</i> from <i>pET24-dsc<sub>A</sub>cssBA 6xhis</i> – digested with <u>ZraI</u> and <u>XhoI</u> then ligated to <i>pET24 – cssA</i> at <u>SnaBI</u> and <u>XhoI</u> | B1F -<br>GGCGGCGGCGACGTCAACGACAATAAACAAGGAACTG<br>GCAATATAAATCTCTGG<br>dscAR - GCGGCGCTCGAGGCTGATGGTGGTGC                                   |
| <i>pET24-cssAB</i>                          | PCR of <i>cssB</i> from <i>pET24-cssB</i> – digested with <u>ZraI</u> and <u>XhoI</u> then ligated to <i>pET24-cssA</i> at <u>SnaBI</u> and <u>XhoI</u>                          | B1F -<br>GGCGGCGGCGACGTCAACGACAATAAACAAGGAACTG<br>GCAATATAAATCTCTGG<br>BR -<br>GCGGCGCTCGAGTTGTTTATTGTCATTTACGTA AAAATGA<br>TACAGTCAAATTTCC |
| <i>pET24-dsc<sub>B</sub>cssABB 6xhis</i>    | PCR of <i>cssB</i> from <i>pET24-dsc<sub>B</sub>cssB 6xhis</i> – digested with <u>Cac8I</u> and <u>XhoI</u> then ligated to <i>pET24-cssAB</i> at <u>SnaBI</u> and <u>XhoI</u>   | B2F -<br>GCGGCGGCGGCTAGCAATGACAATAAACAAGGAACTG<br>GCAATATAAATCTCTGG<br>dscBR - GCGGCGCTCGAGCTGTTTCGATGTTACCG                                |

**Table S2.** Construction of expression clones for CS6 dimeric and trimeric fusions originating from *CssB*.

| Clone                                                  | Primer Set Description                                                                                                                                                                                     | Primer - Sequence                                                                                                |
|--------------------------------------------------------|------------------------------------------------------------------------------------------------------------------------------------------------------------------------------------------------------------|------------------------------------------------------------------------------------------------------------------|
| <i>pET24-cssB</i>                                      | PCR of <i>cssB</i> from ETEC E8775 – digested with <u>NdeI</u> and <u>XhoI</u> and cloned into <i>pET-24a(+)</i>                                                                                           | BF - GCGGCGGCGCATATGGGAAACTGGCAATATAAATCTCTG                                                                     |
|                                                        |                                                                                                                                                                                                            | BR -<br>GCGGCGCTCGAGTTGTTATTGTCATTTACGTAAAATGATACAG<br>TCAAATTTC                                                 |
| <i>pET24-dsc<sub>β</sub>cssB 6xhis</i>                 | Oligos containing DNKQ linker and <i>dsc16</i> from <i>cssB</i> –digested with <u>Cac8I</u> and <u>XhoI</u> then ligated to <i>pET24-cssB</i> at <u>SnaBI</u> and <u>XhoI</u>                              | dsc16BF -<br>GCGGCGGCGGCTAGCAATGACAATAAAACAAGGCAATTGGCAGT<br>ACAAGAGCCTCGACGTGAACGTGAACATCGAACAGCTCGAGGC<br>GGCG |
|                                                        |                                                                                                                                                                                                            | dsc16BR -<br>CGCCGCCCTCGAGCTGTTTCGATGTTACGTTACGTCGAGGCTCT<br>TGTACTGCCAATTGCCTTGTTTATTGTCATTGCTAGCCGCCGCCG<br>C  |
| <i>pET24-dsc<sub>β</sub>cssB 6xhis</i><br><i>SnaBI</i> | Site-directed mutagenesis to incorporate <u>SnaBI</u> before the DNKQ linker for the addition of <i>cssB</i>                                                                                               | sdm BF -<br>GGAAATTGACTGTATCATTTTACGTAAAATGACAATAAACAAG<br>GCAATTGG                                              |
|                                                        |                                                                                                                                                                                                            | sdm BR -<br>CCAATTGCCTTGTTTATTGTCATTTACGTAAAATGATACAGTCA<br>AATTTC                                               |
| <i>pET24-dsc<sub>α</sub>cssBA 6xhis</i>                | PCR of <i>cssA</i> from <i>pET24 - dsc<sub>α</sub>cssA 6xhis</i> - digested with <u>Cac8I</u> and <u>XhoI</u> then ligated to <i>pET24-dsc<sub>β</sub>cssB 6xhis SnaBI</i> at <u>SnaBI</u> and <u>XhoI</u> | A2F -<br>GCGGCGGCGGCTAGCAATGACAATAAAACAAGAACAGAAATA<br>GCGACTAAAAACTTCCC                                         |
|                                                        |                                                                                                                                                                                                            | dscAR - GCGGCGCTCGAGGCTGATGGTGGTGC                                                                               |
| <i>pET24-dsc<sub>β</sub>cssBB 6xhis</i>                | PCR of <i>cssB</i> from <i>pET24 - dsc<sub>β</sub>cssB 6xhis</i> – digested with <u>Cac8I</u> and <u>XhoI</u> then ligated to <i>pET24-dsc16cssB 6xhis SnaBI</i> at <u>SnaBI</u> and <u>XhoI</u>           | B2F -<br>GCGGCGGCGGCTAGCAATGACAATAAAACAAGGAAACTGGCAAT<br>ATAAATCTCTGG                                            |
|                                                        |                                                                                                                                                                                                            | dscBR - GCGGCGCTCGAGCTGTTTCGATGTTACG                                                                             |
| <i>pET24-dsc<sub>β</sub>cssBA 6xhis</i>                |                                                                                                                                                                                                            | dsc16B1F -<br>GCGGCGGCGTACGTAAACGACAATAAAACAAGGAAACTGGCAAT                                                       |

|                                          |                                                                                                                                                                                                      |                                                                                                                                                                        |
|------------------------------------------|------------------------------------------------------------------------------------------------------------------------------------------------------------------------------------------------------|------------------------------------------------------------------------------------------------------------------------------------------------------------------------|
|                                          | Oligos containing DNKQ linker and dsc16 from <i>cssB</i> – digested with <u>SnaBI</u> and <u>XhoI</u> then ligated to <i>pET24-dsc<sub>4</sub>cssBA 6xhis</i> at <u>SnaBI</u> and <u>XhoI</u>        | ATAAATCTCTGGATGTAAATGTAAATATTGAGCAACTCGAGCG<br>CCGC<br>dsc16B1R -<br>GCGGCGCTCGAGTTGCTCAATATTTACATTTACATCCAGAGATT<br>TATATTGCCAGTTTCTTGTTTATTGTCGTTTACGTACGCCGCCG<br>C |
| <i>pET24-ntd<sub>4</sub>cssBA 6xhis</i>  | Site directed mutagenesis performed to delete 14 N-terminal amino acids of <i>cssB</i> in <i>pET24-dsc<sub>4</sub>cssBA 6xhis</i>                                                                    | ntdBAF - GAAGGAGATATACATATGGAGCAAAATTTATTCCAG<br>ntdBAR - CTGGAATAAAATTTGCTCCATATGTATATCTCCTTC                                                                         |
| <i>pET24-ntd<sub>β</sub>cssBA 6xhis</i>  | Site directed mutagenesis performed to delete 14 N-terminal amino acids of <i>cssB</i> in <i>pET24-dsc<sub>β</sub>cssBA 6xhis</i>                                                                    | ntdBAF - GAAGGAGATATACATATGGAGCAAAATTTATTCCAG<br>ntdBAR - CTGGAATAAAATTTGCTCCATATGTATATCTCCTTC                                                                         |
| <i>pET24-dsc<sub>β</sub>cssBAB 6xhis</i> | PCR of <i>cssAB</i> from <i>pET24-dsc<sub>β</sub>cssAB 6xhis</i> – digested with <u>Cac8I</u> and <u>XhoI</u> then ligated to <i>pET24-cssB</i> at <u>SnaBI</u> and <u>XhoI</u>                      | A2F -<br>GCGGCGGGCTAGCAATGACAATAAAACAAAGAACAGAAATA<br>GCGACTAAAAACTTCCC<br>dscBR - GCGGCGCTCGAGCTGTTCGATGTTACAG                                                        |
| <i>pET24-dsc<sub>4</sub>cssBAA 6xhis</i> | PCR of <i>cssA</i> from <i>pET24 - dsc<sub>4</sub>cssA 6xhis</i> – digested with <u>ZraI</u> and <u>XhoI</u> then ligated to <i>pET24-dsc<sub>4</sub>cssBA 6xhis</i> at <u>SnaBI</u> and <u>XhoI</u> | A1F -<br>GGCGGCGGCGACGTCAACGACAATAAAACAAAGAACAGAAATA<br>GCGACTAAAAACTTCCC<br>dscAR - GCGGCGCTCGAGGCTGATGGTGGTGC                                                        |
| <i>pET24-dsc<sub>4</sub>cssBBA 6xhis</i> | PCR of <i>cssBA</i> from <i>pET24- dsc<sub>4</sub>cssBA 6xhis</i> - digested with <u>Cac8I</u> and <u>XhoI</u> then ligated to <i>pET24-cssB</i> at <u>SnaBI</u> and <u>XhoI</u>                     | B2F -<br>GCGGCGGCGGCTAGCAATGACAATAAAACAAGGAAACTGGCAAT<br>ATAAATCTCTGG<br>dscAR - GCGGCGCTCGAGGCTGATGGTGGTGC                                                            |
